# Supplementary material for: Frailty and Recurrent Hospitalization After Transcatheter Aortic Valve Replacement
Source: PubMed Central journal article supplement — J Am Heart Assoc. 2023 Apr 12;12(8):e029264. doi: 10.1161/JAHA.122.029264 (PMC10227237; doi:10.1161/jaha.122.029264), 2023-04-12
Supplement: JAH3-12-e029264-s001.pdf [file JAH3-12-e029264-s001.pdf]

# **Supplemental Material**

**Table S1. The Hospital Frailty Risk Score.**

Codes used and points awarded. Patients were categorized as low (0–4 points), intermediate (5–15 points), and high (>15 points) frailty risk

| <b>Diagnosis description</b>                                                                               | <b>Diagnosis code</b> | <b>Points awarded</b> |
|------------------------------------------------------------------------------------------------------------|-----------------------|-----------------------|
| <b>Dementia in Alzheimer disease</b>                                                                       | F00                   | 7.1                   |
| <b>Hemiplegia</b>                                                                                          | G81                   | 4.4                   |
| <b>Alzheimer's disease</b>                                                                                 | G30                   | 4.0                   |
| <b>Sequelae of cerebrovascular disease</b>                                                                 | I69                   | 3.7                   |
| <b>Other symptoms and signs involving the nervous and musculoskeletal systems (R29.6 Tendency to fall)</b> | R29                   | 3.6                   |
| <b>Other disorders of urinary system (includes urinary tract infection and urinary incontinence)</b>       | N39                   | 3.2                   |
| <b>Delirium, not induced by alcohol and other psychoactive substances</b>                                  | F05                   | 3.2                   |
| <b>Unspecified fall</b>                                                                                    | W19                   | 3.2                   |
| <b>Superficial injury of head</b>                                                                          | S00                   | 3.2                   |
| <b>Unspecified hematuria</b>                                                                               | R31                   | 3.0                   |
| <b>Other bacterial agents as the cause of diseases classified to other chapters (secondary code)</b>       | B96                   | 2.9                   |
| <b>Other symptoms and signs involving cognitive functions and awareness</b>                                | R41                   | 2.7                   |
| <b>Abnormalities of gait and mobility</b>                                                                  | R26                   | 2.6                   |
| <b>Other cerebrovascular diseases</b>                                                                      | I67                   | 2.6                   |
| <b>Convulsions, not elsewhere classified</b>                                                               | R56                   | 2.6                   |
| <b>Somnolence, stupor and coma</b>                                                                         | R40                   | 2.5                   |
| <b>Complications of genitourinary prosthetic devices, implants, and grafts</b>                             | T83                   | 2.4                   |
| <b>Intracranial injury</b>                                                                                 | S06                   | 2.4                   |
| <b>Fracture of shoulder and upper arm</b>                                                                  | S42                   | 2.3                   |
| <b>Other disorders of fluid, electrolyte, and acid-base balance</b>                                        | E87                   | 2.3                   |

|                                                                                               |     |     |
|-----------------------------------------------------------------------------------------------|-----|-----|
| <b>Other joint disorders, not elsewhere classified</b>                                        | M25 | 2.3 |
| <b>Volume depletion</b>                                                                       | E86 | 2.3 |
| <b>Senility</b>                                                                               | R54 | 2.2 |
| <b>Care involving use of rehabilitation procedures</b>                                        | Z50 | 2.1 |
| <b>Unspecified dementia</b>                                                                   | F03 | 2.1 |
| <b>Other fall on same level</b>                                                               | W18 | 2.1 |
| <b>Problems related to medical facilities and other health care</b>                           | Z75 | 2.0 |
| <b>Vascular dementia</b>                                                                      | F01 | 2.0 |
| <b>Superficial injury of lower leg</b>                                                        | S80 | 2.0 |
| <b>Cellulitis</b>                                                                             | L03 | 2.0 |
| <b>Blindness and low vision</b>                                                               | H54 | 1.9 |
| <b>Deficiency of other B group vitamins</b>                                                   | E53 | 1.9 |
| <b>Problems related to social environment</b>                                                 | Z60 | 1.8 |
| <b>Parkinson's disease</b>                                                                    | G20 | 1.8 |
| <b>Syncope and collapse</b>                                                                   | R55 | 1.8 |
| <b>Fracture of rib(s), sternum and thoracic spine</b>                                         | S22 | 1.8 |
| <b>Other functional intestinal disorders</b>                                                  | K59 | 1.8 |
| <b>Acute renal failure</b>                                                                    | N17 | 1.8 |
| <b>Decubitus ulcer</b>                                                                        | L89 | 1.7 |
| <b>Carrier of infectious disease</b>                                                          | Z22 | 1.7 |
| <b>Streptococcus and staphylococcus as the cause of diseases classified to other chapters</b> | B95 | 1.7 |
| <b>Ulcer of lower limb, not elsewhere classified</b>                                          | L97 | 1.6 |
| <b>Other symptoms and signs involving general sensations and perceptions</b>                  | R44 | 1.6 |
| <b>Duodenal ulcer</b>                                                                         | K26 | 1.6 |
| <b>Hypotension</b>                                                                            | I95 | 1.6 |
| <b>Unspecified renal failure</b>                                                              | N19 | 1.6 |
| <b>Other septicemia</b>                                                                       | A41 | 1.6 |

|                                                                                |     |     |
|--------------------------------------------------------------------------------|-----|-----|
| <b>Personal history of other diseases and conditions</b>                       | Z87 | 1.5 |
| <b>Respiratory failure, not elsewhere classified</b>                           | J96 | 1.5 |
| <b>Exposure to unspecified factor</b>                                          | X59 | 1.5 |
| <b>Other arthrosis</b>                                                         | M19 | 1.5 |
| <b>Epilepsy</b>                                                                | G40 | 1.5 |
| <b>Osteoporosis without pathological fracture</b>                              | M81 | 1.4 |
| <b>Fracture of femur</b>                                                       | S72 | 1.4 |
| <b>Fracture of lumbar spine and pelvis</b>                                     | S32 | 1.4 |
| <b>Other disorders of pancreatic internal secretion</b>                        | E16 | 1.4 |
| <b>Abnormal results of function studies</b>                                    | R94 | 1.4 |
| <b>Chronic renal failure</b>                                                   | N18 | 1.4 |
| <b>Retention of urine</b>                                                      | R33 | 1.3 |
| <b>Unknown and unspecified causes of morbidity</b>                             | R69 | 1.3 |
| <b>Other disorders of kidney and ureter, not elsewhere classified</b>          | N28 | 1.3 |
| <b>Unspecified urinary incontinence</b>                                        | R32 | 1.2 |
| <b>Other degenerative diseases of nervous system, not elsewhere classified</b> | G31 | 1.2 |
| <b>Nosocomial condition</b>                                                    | Y95 | 1.2 |
| <b>Other and unspecified injuries of head</b>                                  | S09 | 1.2 |
| <b>Symptoms and signs involving emotional state</b>                            | R45 | 1.2 |
| <b>Transient cerebral ischemic attacks and related syndromes</b>               | G45 | 1.2 |
| <b>Problems related to care-provider dependency</b>                            | Z74 | 1.1 |
| <b>Other soft tissue disorders, not elsewhere classified</b>                   | M79 | 1.1 |
| <b>Fall involving bed</b>                                                      | W06 | 1.1 |
| <b>Open wound of head</b>                                                      | S01 | 1.1 |
| <b>Other bacterial intestinal infections</b>                                   | A04 | 1.1 |
| <b>Diarrhea and gastroenteritis of presumed infectious origin</b>              | A09 | 1.1 |

|                                                                                  |     |     |
|----------------------------------------------------------------------------------|-----|-----|
| <b>Pneumonia, organism unspecified</b>                                           | J18 | 1.1 |
| <b>Pneumonitis due to solids and liquids</b>                                     | J69 | 1.0 |
| <b>Speech disturbances, not elsewhere classified</b>                             | R47 | 1.0 |
| <b>Vitamin D deficiency</b>                                                      | E55 | 1.0 |
| <b>Artificial opening status</b>                                                 | Z93 | 1.0 |
| <b>Gangrene, not elsewhere classified</b>                                        | R02 | 1.0 |
| <b>Symptoms and signs concerning food and fluid intake</b>                       | R63 | 0.9 |
| <b>Other hearing loss</b>                                                        | H91 | 0.9 |
| <b>Fall on and from stairs and steps</b>                                         | W10 | 0.9 |
| <b>Fall on same level from slipping, tripping, and stumbling</b>                 | W01 | 0.9 |
| <b>Thyrotoxicosis [hyperthyroidism]</b>                                          | E05 | 0.9 |
| <b>Scoliosis</b>                                                                 | M41 | 0.9 |
| <b>Dysphagia</b>                                                                 | R13 | 0.8 |
| <b>Dependence on enabling machines and devices</b>                               | Z99 | 0.8 |
| <b>Agent resistant to penicillin and related antibiotics</b>                     | U80 | 0.8 |
| <b>Osteoporosis with pathological fracture</b>                                   | M80 | 0.8 |
| <b>Other diseases of digestive system</b>                                        | K92 | 0.8 |
| <b>Cerebral Infarction</b>                                                       | I63 | 0.8 |
| <b>Calculus of kidney and ureter</b>                                             | N20 | 0.7 |
| <b>Mental and behavioral disorders due to use of alcohol</b>                     | F10 | 0.7 |
| <b>Other medical procedures as the cause of abnormal reaction of the patient</b> | Y84 | 0.7 |
| <b>Abnormalities of heartbeat</b>                                                | R00 | 0.7 |
| <b>Unspecified acute lower respiratory infection</b>                             | J22 | 0.7 |
| <b>Problems related to life-management difficulty</b>                            | Z73 | 0.6 |
| <b>Other abnormal findings of blood chemistry</b>                                | R79 | 0.6 |
| <b>Personal history of risk-factors, not elsewhere classified</b>                | Z91 | 0.5 |
| <b>Open wound of forearm</b>                                                     | S51 | 0.5 |
| <b>Depressive episode</b>                                                        | F32 | 0.5 |

|                                                               |     |     |
|---------------------------------------------------------------|-----|-----|
| <b>Spinal stenosis</b>                                        | M48 | 0.5 |
| <b>Disorders of mineral metabolism</b>                        | E83 | 0.4 |
| <b>Polyarthrosis</b>                                          | M15 | 0.4 |
| <b>Other anemias</b>                                          | D64 | 0.4 |
| <b>Other local infections of skin and subcutaneous tissue</b> | L08 | 0.4 |
| <b>Nausea and vomiting</b>                                    | R11 | 0.3 |
| <b>Other noninfective gastroenteritis and colitis</b>         | K52 | 0.3 |
| <b>Fever of unknown origin</b>                                | R50 | 0.1 |

**Table S2. List of ICD10-, ATC-, NCSP-, and NPU-codes.**

| <b>Population</b>                                              |                                                                                                                                                                                         |                                                                                                                                                                                                                                                                                                                                                                                                                                                                                                                                                                                                                                                                                                                                                                                                                                                                                                                                                                                                                                                                                                                                                                                                                                                                                                                                                                                                                                                                                                                                                                                                                                                                                                                                                                                                                                                                                                                                                                                                                                                                                                                                                                                                                                                                                                                                                                                                                                                                                                                                                                                                                                                                                                                                                                                                                                                                                                                                                                                                                                                                                                                                                                                                                                                                                                                                                                                                                                                                                                                                                                                                                                                                                                                                                                                                                                                                                                                                                                                                                                                                                                                                                                                                                                                                                                                                                                                                                                                                                                                                                                                                                                                                                                                                                                                                                                                                                                                                                                                                                                                                                                                                                                                                                                                                                                                                                                                                                                                                                                                                                                                                                                                                                                                                                                     |
|----------------------------------------------------------------|-----------------------------------------------------------------------------------------------------------------------------------------------------------------------------------------|---------------------------------------------------------------------------------------------------------------------------------------------------------------------------------------------------------------------------------------------------------------------------------------------------------------------------------------------------------------------------------------------------------------------------------------------------------------------------------------------------------------------------------------------------------------------------------------------------------------------------------------------------------------------------------------------------------------------------------------------------------------------------------------------------------------------------------------------------------------------------------------------------------------------------------------------------------------------------------------------------------------------------------------------------------------------------------------------------------------------------------------------------------------------------------------------------------------------------------------------------------------------------------------------------------------------------------------------------------------------------------------------------------------------------------------------------------------------------------------------------------------------------------------------------------------------------------------------------------------------------------------------------------------------------------------------------------------------------------------------------------------------------------------------------------------------------------------------------------------------------------------------------------------------------------------------------------------------------------------------------------------------------------------------------------------------------------------------------------------------------------------------------------------------------------------------------------------------------------------------------------------------------------------------------------------------------------------------------------------------------------------------------------------------------------------------------------------------------------------------------------------------------------------------------------------------------------------------------------------------------------------------------------------------------------------------------------------------------------------------------------------------------------------------------------------------------------------------------------------------------------------------------------------------------------------------------------------------------------------------------------------------------------------------------------------------------------------------------------------------------------------------------------------------------------------------------------------------------------------------------------------------------------------------------------------------------------------------------------------------------------------------------------------------------------------------------------------------------------------------------------------------------------------------------------------------------------------------------------------------------------------------------------------------------------------------------------------------------------------------------------------------------------------------------------------------------------------------------------------------------------------------------------------------------------------------------------------------------------------------------------------------------------------------------------------------------------------------------------------------------------------------------------------------------------------------------------------------------------------------------------------------------------------------------------------------------------------------------------------------------------------------------------------------------------------------------------------------------------------------------------------------------------------------------------------------------------------------------------------------------------------------------------------------------------------------------------------------------------------------------------------------------------------------------------------------------------------------------------------------------------------------------------------------------------------------------------------------------------------------------------------------------------------------------------------------------------------------------------------------------------------------------------------------------------------------------------------------------------------------------------------------------------------------------------------------------------------------------------------------------------------------------------------------------------------------------------------------------------------------------------------------------------------------------------------------------------------------------------------------------------------------------------------------------------------------------------------------------------------------------------------------|
| <b>Transcatheter Aortic Valve Replacement</b>                  | Defined from surgical procedures                                                                                                                                                        | <b>NCSP:</b> KFMD11, KFMD12, KFMD14                                                                                                                                                                                                                                                                                                                                                                                                                                                                                                                                                                                                                                                                                                                                                                                                                                                                                                                                                                                                                                                                                                                                                                                                                                                                                                                                                                                                                                                                                                                                                                                                                                                                                                                                                                                                                                                                                                                                                                                                                                                                                                                                                                                                                                                                                                                                                                                                                                                                                                                                                                                                                                                                                                                                                                                                                                                                                                                                                                                                                                                                                                                                                                                                                                                                                                                                                                                                                                                                                                                                                                                                                                                                                                                                                                                                                                                                                                                                                                                                                                                                                                                                                                                                                                                                                                                                                                                                                                                                                                                                                                                                                                                                                                                                                                                                                                                                                                                                                                                                                                                                                                                                                                                                                                                                                                                                                                                                                                                                                                                                                                                                                                                                                                                                 |
| <b>Exposure</b>                                                |                                                                                                                                                                                         |                                                                                                                                                                                                                                                                                                                                                                                                                                                                                                                                                                                                                                                                                                                                                                                                                                                                                                                                                                                                                                                                                                                                                                                                                                                                                                                                                                                                                                                                                                                                                                                                                                                                                                                                                                                                                                                                                                                                                                                                                                                                                                                                                                                                                                                                                                                                                                                                                                                                                                                                                                                                                                                                                                                                                                                                                                                                                                                                                                                                                                                                                                                                                                                                                                                                                                                                                                                                                                                                                                                                                                                                                                                                                                                                                                                                                                                                                                                                                                                                                                                                                                                                                                                                                                                                                                                                                                                                                                                                                                                                                                                                                                                                                                                                                                                                                                                                                                                                                                                                                                                                                                                                                                                                                                                                                                                                                                                                                                                                                                                                                                                                                                                                                                                                                                     |
| <b>Frailty groups: Low (reference), intermediate, and high</b> | Defined with the Hospital Frailty Risk Score                                                                                                                                            |                                                                                                                                                                                                                                                                                                                                                                                                                                                                                                                                                                                                                                                                                                                                                                                                                                                                                                                                                                                                                                                                                                                                                                                                                                                                                                                                                                                                                                                                                                                                                                                                                                                                                                                                                                                                                                                                                                                                                                                                                                                                                                                                                                                                                                                                                                                                                                                                                                                                                                                                                                                                                                                                                                                                                                                                                                                                                                                                                                                                                                                                                                                                                                                                                                                                                                                                                                                                                                                                                                                                                                                                                                                                                                                                                                                                                                                                                                                                                                                                                                                                                                                                                                                                                                                                                                                                                                                                                                                                                                                                                                                                                                                                                                                                                                                                                                                                                                                                                                                                                                                                                                                                                                                                                                                                                                                                                                                                                                                                                                                                                                                                                                                                                                                                                                     |
| <b>Comorbidities</b>                                           |                                                                                                                                                                                         |                                                                                                                                                                                                                                                                                                                                                                                                                                                                                                                                                                                                                                                                                                                                                                                                                                                                                                                                                                                                                                                                                                                                                                                                                                                                                                                                                                                                                                                                                                                                                                                                                                                                                                                                                                                                                                                                                                                                                                                                                                                                                                                                                                                                                                                                                                                                                                                                                                                                                                                                                                                                                                                                                                                                                                                                                                                                                                                                                                                                                                                                                                                                                                                                                                                                                                                                                                                                                                                                                                                                                                                                                                                                                                                                                                                                                                                                                                                                                                                                                                                                                                                                                                                                                                                                                                                                                                                                                                                                                                                                                                                                                                                                                                                                                                                                                                                                                                                                                                                                                                                                                                                                                                                                                                                                                                                                                                                                                                                                                                                                                                                                                                                                                                                                                                     |
| <b>Percutaneous coronary intervention</b>                      | Defined from surgical procedures                                                                                                                                                        | <b>NCSP:</b> KFNG00, KFNG02, KFNG05, KFNG10, KFNG12, KFNG96                                                                                                                                                                                                                                                                                                                                                                                                                                                                                                                                                                                                                                                                                                                                                                                                                                                                                                                                                                                                                                                                                                                                                                                                                                                                                                                                                                                                                                                                                                                                                                                                                                                                                                                                                                                                                                                                                                                                                                                                                                                                                                                                                                                                                                                                                                                                                                                                                                                                                                                                                                                                                                                                                                                                                                                                                                                                                                                                                                                                                                                                                                                                                                                                                                                                                                                                                                                                                                                                                                                                                                                                                                                                                                                                                                                                                                                                                                                                                                                                                                                                                                                                                                                                                                                                                                                                                                                                                                                                                                                                                                                                                                                                                                                                                                                                                                                                                                                                                                                                                                                                                                                                                                                                                                                                                                                                                                                                                                                                                                                                                                                                                                                                                                         |
| <b>Coronary artery bypass grafting</b>                         | Defined from surgical procedures                                                                                                                                                        | <b>NCSP:</b> KNFA, KFNB, KFNC, KFND, KFNE                                                                                                                                                                                                                                                                                                                                                                                                                                                                                                                                                                                                                                                                                                                                                                                                                                                                                                                                                                                                                                                                                                                                                                                                                                                                                                                                                                                                                                                                                                                                                                                                                                                                                                                                                                                                                                                                                                                                                                                                                                                                                                                                                                                                                                                                                                                                                                                                                                                                                                                                                                                                                                                                                                                                                                                                                                                                                                                                                                                                                                                                                                                                                                                                                                                                                                                                                                                                                                                                                                                                                                                                                                                                                                                                                                                                                                                                                                                                                                                                                                                                                                                                                                                                                                                                                                                                                                                                                                                                                                                                                                                                                                                                                                                                                                                                                                                                                                                                                                                                                                                                                                                                                                                                                                                                                                                                                                                                                                                                                                                                                                                                                                                                                                                           |
| <b>Stroke/systemic embolism</b>                                | Defined from diagnoses codes                                                                                                                                                            | <b>ICD10:</b> I63, I64, I74, G458, G459                                                                                                                                                                                                                                                                                                                                                                                                                                                                                                                                                                                                                                                                                                                                                                                                                                                                                                                                                                                                                                                                                                                                                                                                                                                                                                                                                                                                                                                                                                                                                                                                                                                                                                                                                                                                                                                                                                                                                                                                                                                                                                                                                                                                                                                                                                                                                                                                                                                                                                                                                                                                                                                                                                                                                                                                                                                                                                                                                                                                                                                                                                                                                                                                                                                                                                                                                                                                                                                                                                                                                                                                                                                                                                                                                                                                                                                                                                                                                                                                                                                                                                                                                                                                                                                                                                                                                                                                                                                                                                                                                                                                                                                                                                                                                                                                                                                                                                                                                                                                                                                                                                                                                                                                                                                                                                                                                                                                                                                                                                                                                                                                                                                                                                                             |
| <b>Myocardial infarction</b>                                   | Defined from diagnoses codes                                                                                                                                                            | <b>ICD10:</b> I21-I22                                                                                                                                                                                                                                                                                                                                                                                                                                                                                                                                                                                                                                                                                                                                                                                                                                                                                                                                                                                                                                                                                                                                                                                                                                                                                                                                                                                                                                                                                                                                                                                                                                                                                                                                                                                                                                                                                                                                                                                                                                                                                                                                                                                                                                                                                                                                                                                                                                                                                                                                                                                                                                                                                                                                                                                                                                                                                                                                                                                                                                                                                                                                                                                                                                                                                                                                                                                                                                                                                                                                                                                                                                                                                                                                                                                                                                                                                                                                                                                                                                                                                                                                                                                                                                                                                                                                                                                                                                                                                                                                                                                                                                                                                                                                                                                                                                                                                                                                                                                                                                                                                                                                                                                                                                                                                                                                                                                                                                                                                                                                                                                                                                                                                                                                               |
| <b>Ischemic heart disease</b>                                  | Defined from diagnoses codes                                                                                                                                                            | <b>ICD10:</b> I20-I25                                                                                                                                                                                                                                                                                                                                                                                                                                                                                                                                                                                                                                                                                                                                                                                                                                                                                                                                                                                                                                                                                                                                                                                                                                                                                                                                                                                                                                                                                                                                                                                                                                                                                                                                                                                                                                                                                                                                                                                                                                                                                                                                                                                                                                                                                                                                                                                                                                                                                                                                                                                                                                                                                                                                                                                                                                                                                                                                                                                                                                                                                                                                                                                                                                                                                                                                                                                                                                                                                                                                                                                                                                                                                                                                                                                                                                                                                                                                                                                                                                                                                                                                                                                                                                                                                                                                                                                                                                                                                                                                                                                                                                                                                                                                                                                                                                                                                                                                                                                                                                                                                                                                                                                                                                                                                                                                                                                                                                                                                                                                                                                                                                                                                                                                               |
| <b>Heart failure</b>                                           | Defined from diagnoses codes                                                                                                                                                            | <b>ICD10:</b> I110, I130, I132, I420, I426, I427, I428, I429, I50                                                                                                                                                                                                                                                                                                                                                                                                                                                                                                                                                                                                                                                                                                                                                                                                                                                                                                                                                                                                                                                                                                                                                                                                                                                                                                                                                                                                                                                                                                                                                                                                                                                                                                                                                                                                                                                                                                                                                                                                                                                                                                                                                                                                                                                                                                                                                                                                                                                                                                                                                                                                                                                                                                                                                                                                                                                                                                                                                                                                                                                                                                                                                                                                                                                                                                                                                                                                                                                                                                                                                                                                                                                                                                                                                                                                                                                                                                                                                                                                                                                                                                                                                                                                                                                                                                                                                                                                                                                                                                                                                                                                                                                                                                                                                                                                                                                                                                                                                                                                                                                                                                                                                                                                                                                                                                                                                                                                                                                                                                                                                                                                                                                                                                   |
| <b>Atrial fibrillation</b>                                     | Defined from diagnoses codes                                                                                                                                                            | <b>ICD10:</b> I48                                                                                                                                                                                                                                                                                                                                                                                                                                                                                                                                                                                                                                                                                                                                                                                                                                                                                                                                                                                                                                                                                                                                                                                                                                                                                                                                                                                                                                                                                                                                                                                                                                                                                                                                                                                                                                                                                                                                                                                                                                                                                                                                                                                                                                                                                                                                                                                                                                                                                                                                                                                                                                                                                                                                                                                                                                                                                                                                                                                                                                                                                                                                                                                                                                                                                                                                                                                                                                                                                                                                                                                                                                                                                                                                                                                                                                                                                                                                                                                                                                                                                                                                                                                                                                                                                                                                                                                                                                                                                                                                                                                                                                                                                                                                                                                                                                                                                                                                                                                                                                                                                                                                                                                                                                                                                                                                                                                                                                                                                                                                                                                                                                                                                                                                                   |
| <b>Peripheral artery disease</b>                               | Defined from diagnoses codes or surgical procedures                                                                                                                                     | <b>ICD10:</b> I70, I74, I739<br><b>NCSP:</b> KPDE, KPDE, KPDEG, KPDEH, KPDEI, KPDEJ, KPDEK, KPDEL, KPDEM, KPDEN, KPDEO, KPDEP, KPDEQ, KPDER, KPDES, KPDET, KPDEU, KPDEV, KPDEW, KPDEX, KPDEY, KPDEZ, KPDEAA, KPDEAB, KPDEAC, KPDEAD, KPDEAE, KPDEAF, KPDEAG, KPDEAH, KPDEAI, KPDEAJ, KPDEAK, KPDEAL, KPDEAM, KPDEAN, KPDEAO, KPDEAP, KPDEAQ, KPDEAR, KPDEAS, KPDEAT, KPDEAU, KPDEAV, KPDEAW, KPDEAX, KPDEAY, KPDEAZ, KPDEBA, KPDEBB, KPDEBC, KPDEBD, KPDEBE, KPDEBF, KPDEBG, KPDEBH, KPDEBI, KPDEBJ, KPDEBK, KPDEBL, KPDEBM, KPDEBN, KPDEBO, KPDEBP, KPDEBQ, KPDEBR, KPDEBS, KPDEBT, KPDEBU, KPDEBV, KPDEBW, KPDEBX, KPDEBY, KPDEBZ, KPDECA, KPDECB, KPDECC, KPDECD, KPDECE, KPDECF, KPDECG, KPDECH, KPDECI, KPDECJ, KPDECK, KPDECL, KPDECM, KPDECN, KPDECO, KPDECP, KPDECQ, KPDECR, KPDECS, KPDECT, KPDECU, KPDECV, KPDECW, KPDECX, KPDECY, KPDE CZ, KPDEDA, KPDEDB, KPDEDC, KPDEDD, KPDEDE, KPDEDF, KPDEDG, KPDEDH, KPDEDI, KPDEDJ, KPDEDK, KPDEDL, KPDEDM, KPDEDN, KPDEDO, KPDEDP, KPDEDQ, KPDEDR, KPDEDS, KPDEDT, KPDEDU, KPDEDV, KPDEDW, KPDEDX, KPDEDY, KPDE DZ, KPDEEA, KPDEEB, KPDEEC, KPDEED, KPDEEE, KPDEEF, KPDEEG, KPDEEH, KPDEEI, KPDEEJ, KPDEEK, KPDEEL, KPDEEM, KPDEEN, KPDEEO, KPDEEP, KPDEEQ, KPDEER, KPDEES, KPDEET, KPDEEU, KPDEEV, KPDEEW, KPDEEX, KPDEEY, KPDEEZ, KPDEFA, KPDEFB, KPDEFC, KPDEFD, KPDEFE, KPDEFG, KPDEFH, KPDEFI, KPDEFJ, KPDEFK, KPDEFL, KPDEFM, KPDEFN, KPDEFO, KPDEF P, KPDEFQ, KPDEFR, KPDEFS, KPDEFT, KPDEFU, KPDEFV, KPDEFW, KPDEFX, KPDEFY, KPDEFZ, KPDEGA, KPDEGB, KPDEGC, KPDEGD, KPDEGE, KPDEGF, KPDEGG, KPDEGH, KPDEGI, KPDEGJ, KPDEGK, KPDEGL, KPDEGM, KPDEGN, KPDEGO, KPDEGP, KPDEGQ, KPDEGR, KPDEGS, KPDEGT, KPDEGU, KPDEGV, KPDEGW, KPDEGX, KPDEGY, KPDE GZ, KPDEHA, KPDEHB, KPDEHC, KPDEHD, KPDEHE, KPDEHF, KPDEHG, KPDEHI, KPDEHJ, KPDEHK, KPDEHL, KPDEHM, KPDEHN, KPDEHO, KPDEHP, KPDEHQ, KPDEHR, KPDEHS, KPDEHT, KPDEHU, KPDEHV, KPDEHW, KPDEHX, KPDEHY, KPDE HZ, KPDEIA, KPDEIB, KPDEIC, KPDEID, KPDEIE, KPDEIF, KPDEIG, KPDEIH, KPDEIJ, KPDEIK, KPDEIL, KPDEIM, KPDEIN, KPDEIO, KPDEIP, KPDEIQ, KPDEIR, KPDEIS, KPDEIT, KPDEIU, KPDEIV, KPDEIW, KPDEIX, KPDEIY, KPDE IZ, KPDEJA, KPDEJB, KPDEJC, KPDEJD, KPDEJE, KPDEJF, KPDEJG, KPDEJH, KPDEJI, KPDEJJ, KPDEJK, KPDEJL, KPDEJM, KPDEJN, KPDEJO, KPDEJP, KPDEJQ, KPDEJR, KPDEJS, KPDEJT, KPDEJU, KPDEJV, KPDEJW, KPDEJX, KPDEJY, KPDE JZ, KPDEKA, KPDEKB, KPDEKC, KPDEKD, KPDEKE, KPDEKF, KPDEKG, KPDEKH, KPDEKI, KPDEKJ, KPDEKK, KPDEKL, KPDEKM, KPDEKN, KPDEKO, KPDEKP, KPDEKQ, KPDEKR, KPDEKS, KPDEKT, KPDEKU, KPDEKV, KPDEKW, KPDEKX, KPDEKY, KPDE KZ, KPDELA, KPDELB, KPDELC, KPDELD, KPDELE, KPDELF, KPDELG, KPDELH, KPDELI, KPDELJ, KPDELK, KPDELL, KPDELM, KPDELN, KPDELO, KPDELP, KPDELQ, KPDELR, KPDELS, KPDELT, KPDELU, KPDELV, KPDELW, KPDELX, KPDELY, KPDE LZ, KPDEMA, KPDEMB, KPDEMC, KPDEMD, KPDEME, KPDEMF, KPDEMG, KPDEMH, KPDEMI, KPDEMJ, KPDEMK, KPDEML, KPDEMM, KPDEMN, KPDEMO, KPDEMP, KPDEMQ, KPDEMR, KPDEMS, KPDEMT, KPDEMU, KPDEMV, KPDEMW, KPDEMX, KPDEMY, KPDE MZ, KPDENA, KPDENB, KPDENC, KPDEND, KPDENE, KPDEFN, KPDEFO, KPDEF P, KPDEFQ, KPDEFR, KPDEFS, KPDEFT, KPDEFU, KPDEFV, KPDEFW, KPDEFX, KPDEFY, KPDEFZ, KPDEOA, KPDEOB, KPDEOC, KPDEOD, KPDEOE, KPDEOF, KPDEOG, KPDEOH, KPDEOI, KPDEOJ, KPDEOK, KPDEOL, KPDEOM, KPDEON, KPDEOO, KPDEOP, KPDEOQ, KPDEOR, KPDEOS, KPDEOT, KPDEOU, KPDEOV, KPDEOW, KPDEOX, KPDEOY, KPDE OZ, KPDEPA, KPDEPB, KPDEPC, KPDEPD, KPDEPE, KPDEPF, KPDEPG, KPDEPH, KPDEPI, KPDEPJ, KPDEPK, KPDEPL, KPDEPM, KPDEPN, KPDEPO, KPDEPP, KPDEPQ, KPDEPR, KPDEPS, KPDEPT, KPDEPU, KPDEPV, KPDEPW, KPDEPX, KPDEPY, KPDE PZ, KPDEQA, KPDEQB, KPDEQC, KPDEQD, KPDEQE, KPDEQF, KPDEQG, KPDEQH, KPDEQI, KPDEQJ, KPDEQK, KPDEQL, KPDEQM, KPDEQN, KPDEQO, KPDEQP, KPDEQQ, KPDEQR, KPDEQS, KPDEQT, KPDEQU, KPDEQV, KPDEQW, KPDEQX, KPDEQY, KPDE QZ, KPDERA, KPDERB, KPDERC, KPDERD, KPDERE, KPDERF, KPDERG, KPDERH, KPDERI, KPDERJ, KPDERK, KPDERL, KPDERM, KPDERN, KPDERO, KPDERP, KPDERQ, KPDERR, KPDER S, KPDER T, KPDERU, KPDERV, KPDERW, KPDERX, KPDERY, KPDERZ, KPDESA, KPDESB, KPDESC, KPDESD, KPDESE, KPDESF, KPDESG, KPDESH, KPDESI, KPDESJ, KPDESK, KPDESL, KPDESM, KPDESN, KPDESO, KPDESP, KPDESQ, KPDESR, KPDESS, KPDEST, KPDESU, KPDESV, KPDESW, KPDESX, KPDESY, KPDE SZ, KPDETA, KPDETB, KPDETC, KPDETD, KPDETE, KPDETF, KPDETG, KPDETH, KPDETI, KPDETJ, KPDETK, KPDETL, KPDETM, KPDETN, KPDETO, KPDETP, KPDETQ, KPDETR, KPDETS, KPDETT, KPDETU, KPDETV, KPDETW, KPDETX, KPDETY, KPDE TZ, KPDEUA, KPDEUB, KPDEUC, KPDEUD, KPDEUE, KPDEUF, KPDEUG, KPDEUH, KPDEUI, KPDEUJ, KPDEUK, KPDEUL, KPDEUM, KPDEUN, KPDEUO, KPDEUP, KPDEUQ, KPDEUR, KPDEUS, KPDEUT, KPDEUU, KPDEUV, KPDEUW, KPDEUX, KPDEUY, KPDE UZ, KPDEVA, KPDEVB, KPDEVC, KPDEVD, KPDEVE, KPDEVF, KPDEVG, KPDEVH, KPDEVI, KPDEVJ, KPDEVK, KPDEVL, KPDEVM, KPDEVN, KPDEVO, KPDEVP, KPDEVQ, KPDEVR, KPDEVS, KPDEVT, KPDEVU, KPDEVV, KPDEVW, KPDEVX, KPDEVY, KPDE VZ, KPDEWA, KPDEWB, KPDEWC, KPDEWD, KPDEWE, KPDEFW, KPDEWG, KPDEWH, KPDEWI, KPDEWJ, KPDEWK, KPDEWL, KPDEWM, KPDEWN, KPDEWO, KPDEWP, KPDEWQ, KPDEWR, KPDEWS, KPDEWT, KPDEWU, KPDEWV, KPDEWW, KPDEWX, KPDEWY, KPDE WZ, KPDEXA, KPDEXB, KPDEXC, KPDEXD, KPDEXE, KPDEXF, KPDEXG, KPDEXH, KPDEXI, KPDEXJ, KPDEXK, KPDEXL, KPDEXM, KPDEXN, KPDEXO, KPDEXP, KPDEXQ, KPDEXR, KPDEXS, KPDEXT, KPDEXU, KPDEXV, KPDEXW, KPDEXX, KPDEXY, KPDEX Z, KPDEYA, KPDEYB, KPDEYC, KPDEYD, KPDEYE, KPDEYF, KPDEYG, KPDEYH, KPDEYI, KPDEYJ, KPDEYK, KPDEYL, KPDEYM, KPDEYN, KPDEYO, KPDEYP, KPDEYQ, KPDEYR, KPDEYS, KPDEYT, KPDEYU, KPDEYV, KPDEYW, KPDEYX, KPDEY Y, KPDEYZ, KPDEZA, KPDEZB, KPDEZC, KPDEZD, KPDEZE, KPDEZF, KPDEZG, KPDEZH, KPDEZI, KPDEZJ, KPDEZK, KPDEZL, KPDEZM, KPDEZN, KPDEZO, KPDEZP, KPDEZQ, KPDEZR, KPDEZS, KPDEZT, KPDEZU, KPDEZV, KPDEZW, KPDEZX, KPDEZY, KPDE ZZ |
| <b>Hypertension</b>                                            | Defined from diagnoses codes or treatment with 2 or more antihypertensive drugs: adrenergic $\alpha$ -antagonists, non-loop diuretics, vasodilators, $\beta$ -blockers, calcium channel | <b>ICD10:</b> I10-15<br><b>ATC:</b> C02A, C02B, C02C, C02L, C03A, C03B, C03D, C03E, C03X, C07B, C07C, C07D, C08G, C02DA, C09BA, C09DA, C02DB, C02DD, C02DG, C07A,                                                                                                                                                                                                                                                                                                                                                                                                                                                                                                                                                                                                                                                                                                                                                                                                                                                                                                                                                                                                                                                                                                                                                                                                                                                                                                                                                                                                                                                                                                                                                                                                                                                                                                                                                                                                                                                                                                                                                                                                                                                                                                                                                                                                                                                                                                                                                                                                                                                                                                                                                                                                                                                                                                                                                                                                                                                                                                                                                                                                                                                                                                                                                                                                                                                                                                                                                                                                                                                                                                                                                                                                                                                                                                                                                                                                                                                                                                                                                                                                                                                                                                                                                                                                                                                                                                                                                                                                                                                                                                                                                                                                                                                                                                                                                                                                                                                                                                                                                                                                                                                                                                                                                                                                                                                                                                                                                                                                                                                                                                                                                                                                   |

blockers, renin-angiotensin system inhibitors.

C07B, C07C, C07D, C07F, C08, C09BB, C09DB, C09AA, C09BA, C09BB, C09CA, C09DA, C09DB, C09XA02, C09XA52, C03C, C03EB

|                                                 |                                          |                                                                                                                                                                                  |
|-------------------------------------------------|------------------------------------------|----------------------------------------------------------------------------------------------------------------------------------------------------------------------------------|
| <b>Diabetes mellitus</b>                        | Defined from glucose-lowering medication | <b>ATC:</b> A10                                                                                                                                                                  |
| <b>Chronic kidney disease</b>                   | Defined from diagnoses codes             | <b>ICD10:</b> E102, E112, E122, E132, E142, I120, N02-N08, N11, N12, N14, N18, N19, N26, Q61, N158, N159, N160, N162, N163, N164, N168, N391, Q612, Q613, Q615, Q619, Z940, Z992 |
| <b>Chronic obstructive pulmonary disease</b>    | Defined from diagnoses codes             | <b>ICD10:</b> J44                                                                                                                                                                |
| <b>Pharmacotherapy</b>                          |                                          |                                                                                                                                                                                  |
| <b>Adenosine-phosphate receptor antagonists</b> | Defined from ATC codes                   | <b>ATC:</b> B01AC04, B01AC22, B01AC24                                                                                                                                            |
| <b>Aspirin</b>                                  | Defined from ATC codes                   | <b>ATC:</b> B01AC06 N02BA01                                                                                                                                                      |
| <b>Non-steroidal-anti-inflammatory-drugs</b>    | Defined from ATC codes                   | <b>ATC:</b> M01A, except M01AX05                                                                                                                                                 |
| <b>Beta-blockers</b>                            | Defined from ATC codes                   | <b>ATC:</b> C07A, C07B, C07C, C07D, C07F                                                                                                                                         |
| <b>Calcium channel blockers</b>                 | Defined from ATC codes                   | <b>ATC:</b> C07F, C08, C09BB, C09DB                                                                                                                                              |
| <b>Renin-angiotensin system inhibitors</b>      | Defined from ATC codes                   | <b>ATC:</b> C09AA, C09BA, C09BB, C09CA, C09DA, C09DB, C09XA02, C09XA52                                                                                                           |
| <b>Loop diuretics</b>                           | Defined from ATC codes                   | <b>ATC:</b> C03C C03EB                                                                                                                                                           |



**Figure S1. Trends in frailty over time.**

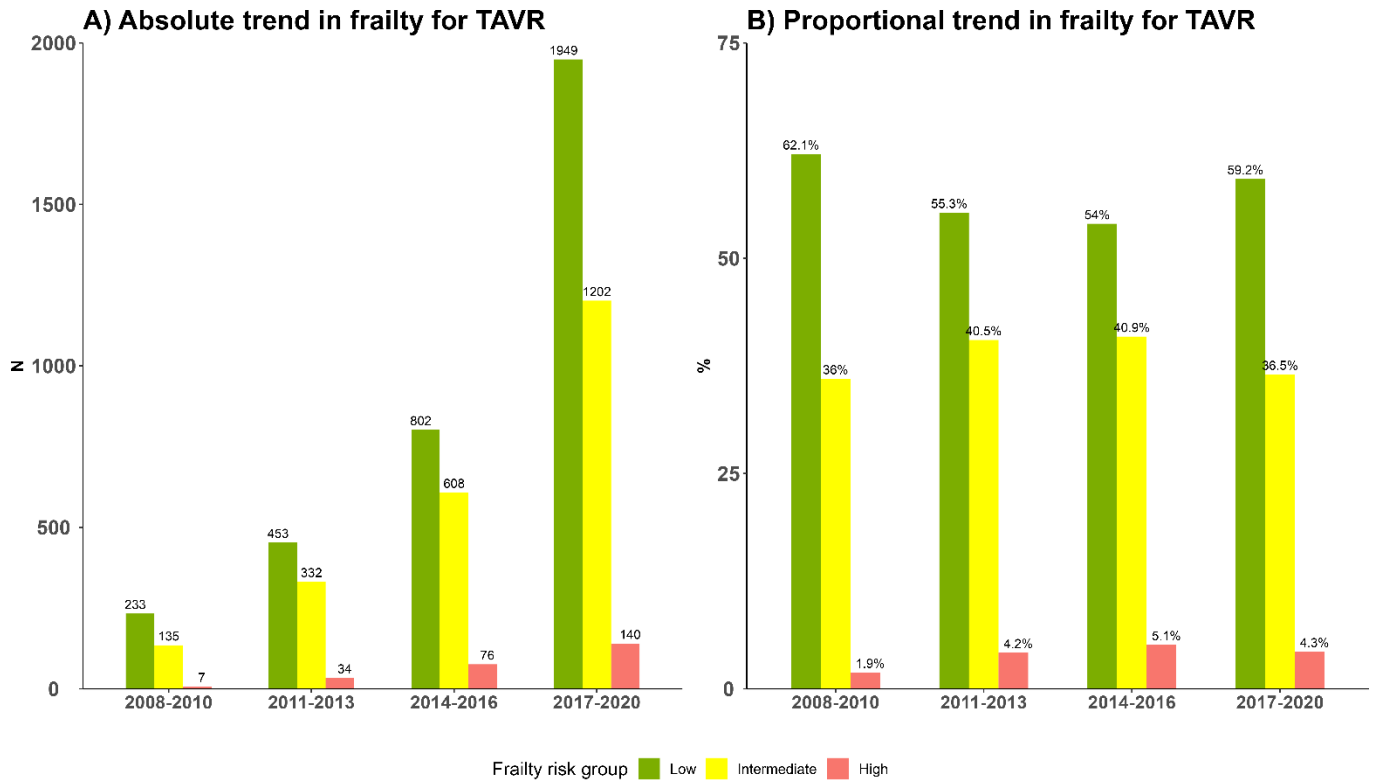

Panel A shows the absolute trend in frailty for TAVR over time with the x-axis illustrating year groups and the y-axis number of patients (also illustrated in the numbers above bars). Panel B shows the proportional trend in frailty for TAVR over time. The x-axis represents calendar year groups. The y-axis shows the proportion of patients in each frailty group for a given calendar year group. As such, the numbers above bars sum to 100%.

TAVR: Transcatheter aortic valve replacement.
